# Supplementary material for: A microfluidic-based filtration system to enrich for bone marrow disseminated tumor cells from breast cancer patients
Source: PubMed Central journal article supplement (PMC8121342; doi:10.1371/journal.pone.0246139), 2021-05-14
Supplement: pone.0246139.s002.pdf [file pone.0246139.s002.pdf]

**S1 Table:** Details of probes used for gene specific amplification using DDPCR

| Transcript    | TaqMan® Gene Expression Assay ID |
|---------------|----------------------------------|
| <i>EPCAM</i>  | Hs00901885_m1                    |
| <i>ERBB2</i>  | Hs01001580_m1                    |
| <i>PDL-1</i>  | Hs00204257_m1                    |
| <i>PDGFRB</i> | Hs01019589_m1                    |
| <i>STEAP1</i> | Hs00185180_m1                    |
| <i>TWIST1</i> | Hs00361186_m1                    |
| <i>WNT5A</i>  | Hs00998537_m1                    |
