# Supplementary material for: A microfluidic-based filtration system to enrich for bone marrow disseminated tumor cells from breast cancer patients
Source: PubMed Central journal article supplement (PMC8121342; doi:10.1371/journal.pone.0246139), 2021-05-14
Supplement: pone.0246139.s004.pdf [file pone.0246139.s004.pdf]

**S3 Table** : Literature review of captured cell yield using Parsortix  
 \*number of leukocytes per ml blood=10<sup>6</sup>

| Author         | Cancer cell line       | Volume loaded          | Cell capture in cassette (%) | Cell Harvested from cassette (% of captured cells) | Recovery (capture cells X harvested cells) | Harvested nucleated cells (number total) | Fold reduction in WBC* |
|----------------|------------------------|------------------------|------------------------------|----------------------------------------------------|--------------------------------------------|------------------------------------------|------------------------|
| Pillai         | Breast cancer          | 2 ml <b>BM</b>         | 30-84%                       | 11-73%                                             | 4-61%                                      | 11300                                    | 2550                   |
| Pillai         | Breast cancer          | 7 ml blood early stage |                              |                                                    |                                            | 5270                                     | 5950                   |
| Pillai         | Breast cancer          | 7 ml blood metastatic  |                              |                                                    |                                            | 8100                                     | 4570                   |
| Hvichia[25]    | Multiple               | 4 ml blood             | 42-70%                       | 54-69%                                             | 22-49%                                     | 200-5000                                 | 800-20,000             |
| Maertens[27]   | Renal cancer           | 5 ml blood             |                              |                                                    | 30-87%                                     |                                          |                        |
| Porras[44]     | Breast cancer          | 7.5 ml blood           | 61-75%                       |                                                    | 20%                                        | 542-5174                                 |                        |
| Miller[26]     | Breast cancer          | 5 ml blood             | 66-92%                       | 62-84%                                             | 38-77%                                     | 1000-4000                                |                        |
| Lampignano[40] | Breast cancer          | 7.5 ml blood           | 46-80%                       | 42-100%                                            | 20-80%                                     |                                          |                        |
| Xu[24]         | Prostate cancer        | 3 ml blood             | 58-66%                       | 35-50%                                             | 20-52%                                     | 927                                      |                        |
| Chudziak[28]   | Colorectal cancer      | 4 ml blood             |                              |                                                    | 57-83                                      | 2610-3069                                |                        |
| Franken[50]    | Breast cancer          | 7.5 ml blood           | 56-78%                       | 55-75%                                             | 42%                                        |                                          |                        |
| Obermayr[51]   | Small cell lung cancer | 10 ml blood            | 28%                          |                                                    |                                            |                                          |                        |
