# Supplementary material for: A microfluidic-based filtration system to enrich for bone marrow disseminated tumor cells from breast cancer patients
Source: PLOS journal article supplement (doi:10.1371/journal.pone.0246139), 2021-05-14
Supplement: S3 (10.1371/journal.pone.0246139.s003) [file journal.pone.0246139.s003]

## S2 Table: Cassette optimization for processing BM specimen

|                                                   |             |             |             | BM1         | BM2         | BM3         | BM4           | BM5           | BM6           |             |             |             |
|---------------------------------------------------|-------------|-------------|-------------|-------------|-------------|-------------|---------------|---------------|---------------|-------------|-------------|-------------|
| <b>Pt ID</b>                                      | <b>8219</b> | <b>1179</b> | <b>8219</b> | <b>2595</b> | <b>1184</b> | <b>1185</b> | <b>3053-2</b> | <b>7370-1</b> | <b>7370-2</b> | <b>9391</b> | <b>8219</b> | <b>8167</b> |
| <b>Cassette gap (um)</b>                          | 4.5         | 6.5         | 6.5         | 6.5         | 6.5         | 6.5         | 6.5           | 6.5           | 6.5           | 8           | 8           | 10          |
| <b>Total cell input (x10<sup>6</sup>)</b>         | 66.6        | 60.6        | 66.6        | 52          | 16          | 80          | 19            | 86            | 86            | 19.5        | 66.6        | -           |
| <b>BC cells spiked</b>                            | 203         | ~200        | 158         | 124         | 108         | 248         | 181           | 154           | 157           | ~200        | 178         | 124         |
| <b>BC captured (%)</b>                            | 47 (23)     | 133 (66)    | 152 (96)    | 104 (84)    | 38 (35)     | 188 (76)    | 66 (36)       | 46 (30)       | 71 (45)       | 136         | 178 (100)   | 52 (42)     |
| <b>BC harvested (%)</b>                           | 20 (10)     | 69 (35)     | 17 (11)     | 88 (71)     | 28 (26)     | 108 (44)    | 7 (4)         | 13 (8)        | 39 (25)       | 109 (55)    | 34 (20)     | 10 (8)      |
| <b>BC retained in cassette (%)</b>                | 27 (13)     | 64 (32)     | 135 (85)    | 16 (13)     | 10 (9)      | 80 (32)     | 59 (32)       | 33 (21)       | 32 (20)       | 27 (13.5)   | 144 (81)    | 42 (34)     |
| <b>Total harvest cell count (x10<sup>4</sup>)</b> | 11.3        | 2.8         | 21          | 75.5        | 29          | 28          | 12            | 32            | 21.5          | 14.6        | 93          | 37.2        |
| <b>Fold enrichment (FirstHarvest)</b>             | 589         | 2133        | 317         | 423         | 143         | 98          | 61            | 220           | 89            | 133         | 71          |             |
